# Supplementary material for: Regulation of morphogen pathways by a Drosophila chondroitin sulfate proteoglycan Windpipe
Source: Oxford University Press journal article supplement (doi:10.1242/jcs.260525), 2023-03-10
Supplement: jcs260525supp.pdf [file jcs260525supp.pdf]

**Table S1. Genotypes of *Drosophila* strains used in each figure**

| Figure | Panel            | Genotype                                                                                                        |
|--------|------------------|-----------------------------------------------------------------------------------------------------------------|
| 1      | A-G              | +/+                                                                                                             |
| 1      | D-G              | <i>wdp</i> <sup>KO</sup> / <i>wdp</i> <sup>KO</sup>                                                             |
| 1      | D                | <i>Act5C-Gal4/UAS-Chsy</i> <sup>RNAi.GD14159</sup>                                                              |
| 1      | D                | <i>wdp-HA</i> /+                                                                                                |
| 1      | D                | <i>Act5C-Gal4/UAS-Chsy</i> <sup>RNAi.GD14159</sup> ; <i>wdp-HA</i> /+                                           |
| 2      | A, D             | +/+                                                                                                             |
| 2      | B                | <i>UAS-Chsy</i> <sup>RNAi.GD14159</sup> /+; <i>hh-Gal4 UAS-GFP</i> /+                                           |
| 2      | C, D             | <i>wdp</i> <sup>KO</sup> / <i>wdp</i> <sup>KO</sup>                                                             |
| 2      | E                | <i>hh-Gal4 UAS-GFP/UAS-wdp</i> <sup>RNAi.HM05118</sup>                                                          |
| 2      | F                | <i>UAS-C4ST (UAS-CG31743.IR.Y)</i> /+; <i>hh-Gal4 UAS-GFP</i> /+                                                |
| 2      | G                | <i>trol-GFP</i> /+; <i>wdp-HA</i> /+                                                                            |
| 3      | A, D             | <i>Bx</i> <sup>MS1096</sup> - <i>Gal4</i> /+                                                                    |
| 3      | B, D             | <i>Bx</i> <sup>MS1096</sup> - <i>Gal4</i> /+; <i>UAS-wdp</i> /+                                                 |
| 3      | C, D             | <i>Bx</i> <sup>MS1096</sup> - <i>Gal4/UAS-C4ST (UAS-CG31743.IR.Y)</i> ; <i>UAS-wdp</i> /+                       |
| 4      | A, E, H          | +/+                                                                                                             |
| 4      | B-D              | <i>nub-Gal4</i> /+; <i>UAS-wdp</i> /+                                                                           |
| 4      | F-H              | <i>hs-flp</i> /+; <i>Act5C&gt;CD2&gt;Gal4 UAS-GFP</i> /+; <i>UAS-wdp</i> /+                                     |
| 5      | A, E, H          | +/+                                                                                                             |
| 5      | B-D, F           | <i>nub-Gal4</i> /+; <i>UAS-wdp</i> /+                                                                           |
| 5      | G, I, J          | <i>ap-GAL4 UAS-GFP</i> /+; <i>UAS-wdp</i> /+                                                                    |
| 5      | K, L             | <i>hs-flp</i> /+; <i>Act5C&gt;CD2&gt;Gal4 UAS-GFP</i> /+; <i>UAS-wdp</i> /+                                     |
| 5      | M                | <i>hs-flp</i> /+; <i>Act5C&gt;CD2&gt;Gal4 UAS-GFP</i> /+; <i>UAS-3xMyc-wdp</i> <sup>ΔGAG</sup> /+               |
| 6      | A, J, M          | +/+                                                                                                             |
| 6      | B                | <i>wdp</i> <sup>KO</sup> / <i>wdp</i> <sup>KO</sup>                                                             |
| 6      | C                | <i>Sulf1</i> <sup>ΔP1</sup> / <i>Sulf1</i> <sup>ΔP1</sup>                                                       |
| 6      | D-I, K, L, N, O  | <i>wdp</i> <sup>KO</sup> / <i>wdp</i> <sup>KO</sup> ; <i>Sulf1</i> <sup>ΔP1</sup> / <i>Sulf1</i> <sup>ΔP1</sup> |
| 7      | A, B, E, J, K    | +/+                                                                                                             |
| 7      | C, D, H, I, J, L | <i>wdp</i> <sup>KO</sup> / <i>wdp</i> <sup>KO</sup> ; <i>Sulf1</i> <sup>ΔP1</sup> / <i>Sulf1</i> <sup>ΔP1</sup> |
| 7      | F                | <i>wdp</i> <sup>KO</sup> / <i>wdp</i> <sup>KO</sup>                                                             |
| 7      | G                | <i>Sulf1</i> <sup>ΔP1</sup> / <i>Sulf1</i> <sup>ΔP1</sup>                                                       |
| 8      | A, C, F          | +/+                                                                                                             |
| 8      | B, E, I          | <i>wdp</i> <sup>KO</sup> / <i>wdp</i> <sup>KO</sup> ; <i>dally</i> <sup>gem</sup> / <i>dally</i> <sup>gem</sup> |
| 8      | D, H             | <i>dally</i> <sup>gem</sup> / <i>dally</i> <sup>gem</sup>                                                       |
| 8      | G                | <i>wdp</i> <sup>KO</sup> / <i>wdp</i> <sup>KO</sup>                                                             |
| 8      | J                | <i>dpp</i> <sup>d-ho</sup> / <i>dpp</i> <sup>d-ho</sup>                                                         |
| 8      | K                | <i>upd</i> <sup>os-s</sup> / <i>upd</i> <sup>os-s</sup>                                                         |
| 8      | L                | <i>Mef2-Gal4/UAS-ttv RNAi</i> <sup>GD1993</sup>                                                                 |
| 8      | M                | <i>Mef2-Gal4/UAS-sfl RNAi</i> <sup>HMS00543</sup>                                                               |

**Table S2. Disaccharide analyses of CS from wild-type and *wdp* mutant adults.**

Disaccharide composition of CS is shown for each respective genotype. The values are given as mol% of total disaccharides, and represent mean  $\pm$  S.D. from three independent experiments. Graphical depiction of this result is shown in Fig. 1E and F.

|            | CS (unsaturated disaccharide, %) |                | Total amount     |
|------------|----------------------------------|----------------|------------------|
|            | $\Delta$ Di-0S                   | $\Delta$ Di-4S | (ng/mg)          |
| wild-type  | 73.1 $\pm$ 0.4                   | 26.9 $\pm$ 0.4 | 159.0 $\pm$ 4.7  |
| <i>wdp</i> | 75.1 $\pm$ 0.3                   | 24.9 $\pm$ 0.3 | 128.9 $\pm$ 12.9 |

**Table S3. Disaccharide analyses of HS from wild-type and *wdp* mutant adults.**

Disaccharide composition of HS is shown for each respective genotype. The values are given as mol% of total disaccharides, and represent mean  $\pm$  S.D. from three independent experiments. NAc,  $\Delta$ UA-GlcNAc; NS,  $\Delta$ UA-GlcNS; NAc6S,  $\Delta$ UA-GlcNAc6S; NS6S,  $\Delta$ UA-GlcNS6S; 2SNS,  $\Delta$ UA2S-GlcNS; and 2SNS6S,  $\Delta$ UA2S-GlcNS6S. A graph showing total amount of HS is shown in Fig. 1G.

|            | HS (unsaturated disaccharide, %) |                |               |                |                |               | Total amount   |
|------------|----------------------------------|----------------|---------------|----------------|----------------|---------------|----------------|
|            | NAc                              | NS             | NAc6S         | NS6S           | 2SNS           | 2SNS6S        | (ng/mg)        |
| wild-type  | 44.9 $\pm$ 5.2                   | 20.9 $\pm$ 2.2 | 1.8 $\pm$ 0.2 | 16.1 $\pm$ 1.9 | 13.3 $\pm$ 1.3 | 3.0 $\pm$ 0.7 | 17.7 $\pm$ 1.6 |
| <i>wdp</i> | 45.4 $\pm$ 4.6                   | 21.3 $\pm$ 2.4 | 1.6 $\pm$ 0.1 | 14.9 $\pm$ 0.7 | 14.0 $\pm$ 1.3 | 2.9 $\pm$ 0.4 | 25.5 $\pm$ 1.5 |

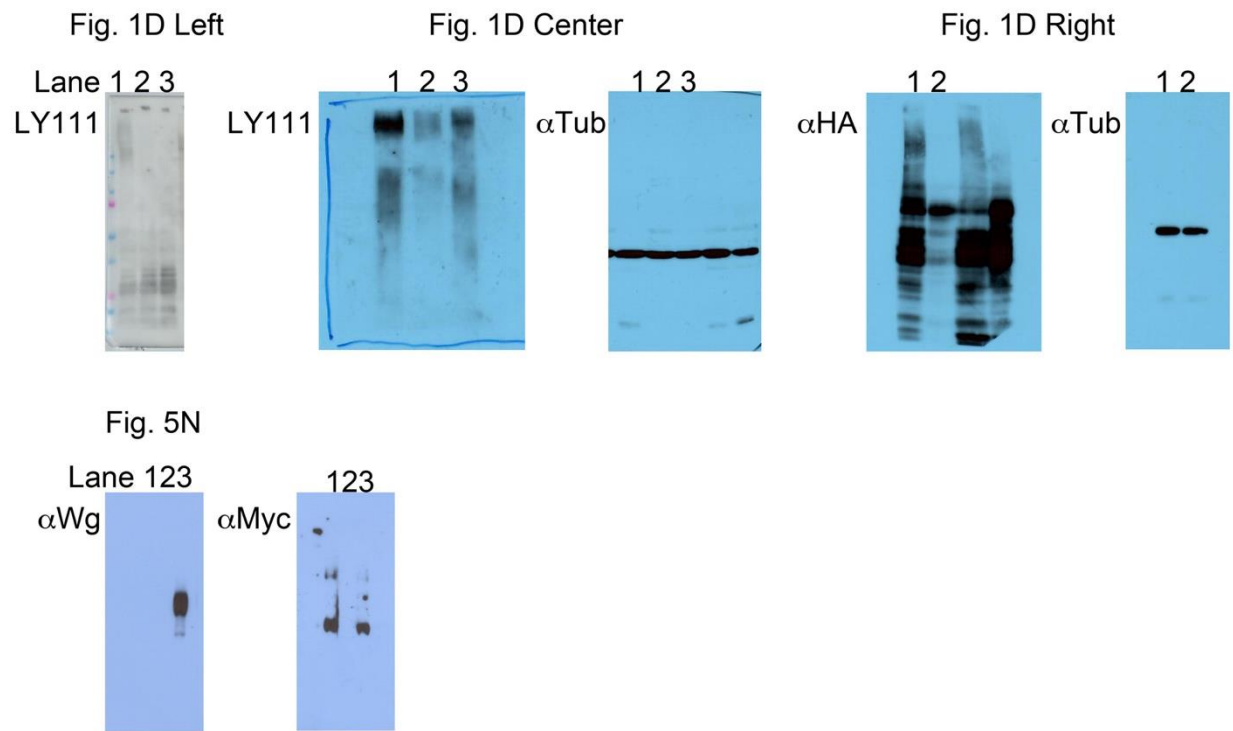

**Fig. S1. Blot transparency.**

Original Immunoblot data used for Fig. 1D and Fig. 5N are shown. Only the lanes with lane numbers were used in each panel. Antibodies used are indicated.
